# Supplementary material
Source: Springer Nature journal article supplement (https://www.springermedizin.de/resource/supplementary/12879_2012_2182_MOESM2_ESM.pdf/9443886)

% of T cell proliferation

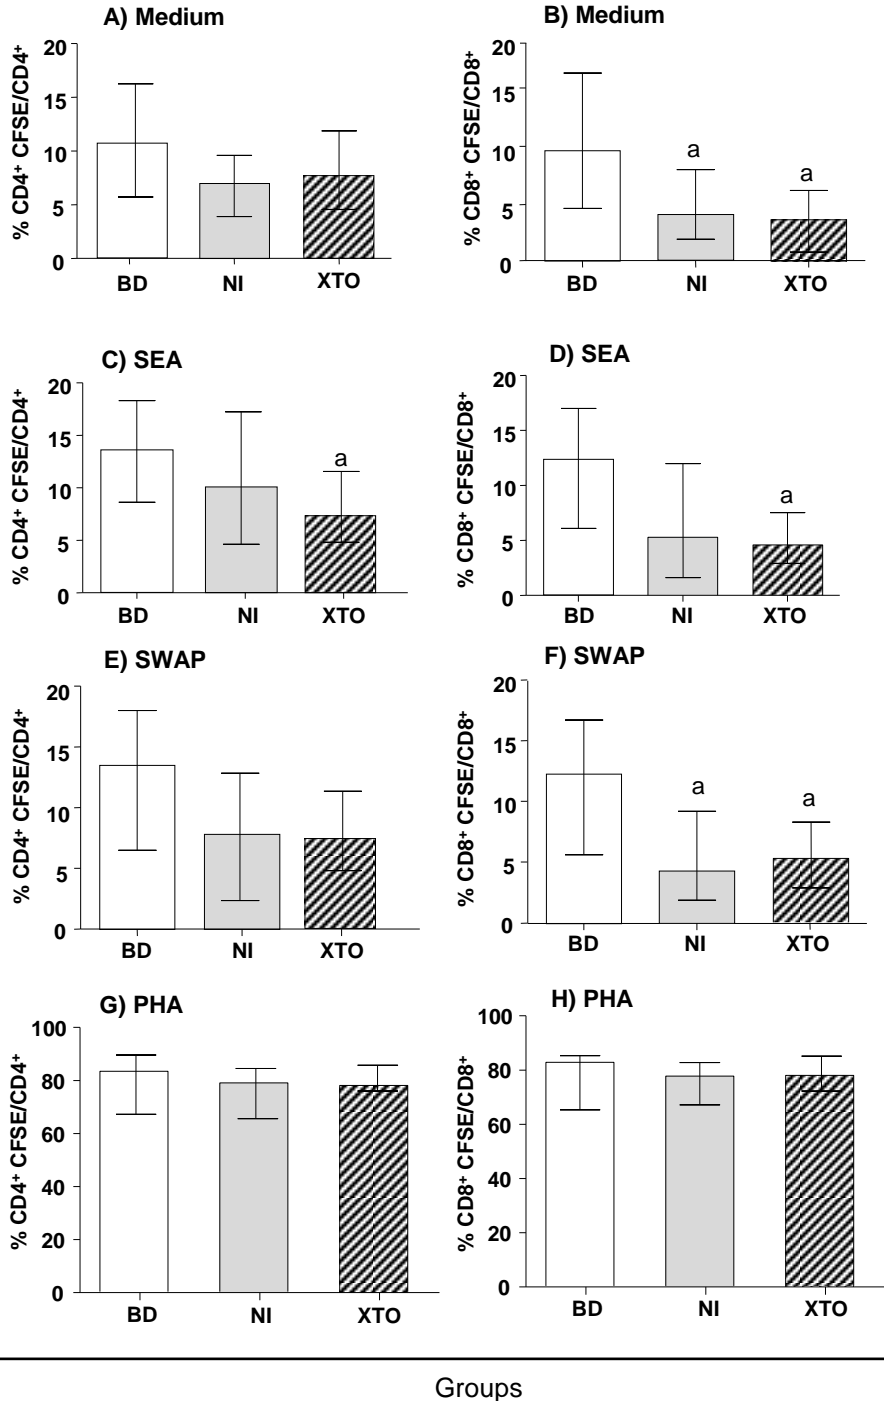

Groups

Supplement: MOESM2 [file 9443886]
